# Supplementary material for: Evaluation of a 3D printed training model with realistic spatial-anatomical conditions for head and neck microsurgery
Source: Springer Nature journal article supplement (doi:10.1007/s00784-025-06314-4), 2025-04-08
Supplement: MOESM1 [file 784_2025_6314_MOESM1_ESM.pdf]

# Competency Assessment Tool (CAT) for microsurgical training model and programme

**Trainee name:** \_\_\_\_\_ **Assessor:** \_\_\_\_\_ **Date:** \_\_\_\_/\_\_\_\_/\_\_\_\_

1. Please ✓ the description that best describes the observed performance:

| TASK | DISSECTION AND TISSUE HANDLING                      |                                                                    |  | INSTRUMENT USE                                   |                                                                        |  | SEWING TECHNIQUE                        |                                                       |  | END-PRODUCT QUALITY                     |                                                  |  |
|------|-----------------------------------------------------|--------------------------------------------------------------------|--|--------------------------------------------------|------------------------------------------------------------------------|--|-----------------------------------------|-------------------------------------------------------|--|-----------------------------------------|--------------------------------------------------|--|
|      | <b>Vascular dissection (Q1.1)</b>                   |                                                                    |  | <b>Needle holder and forceps handling (Q2.1)</b> |                                                                        |  | <b>Seam quality reverse side (Q3.1)</b> |                                                       |  | <b>Time needed for procedure (Q4.1)</b> |                                                  |  |
|      | Damaging (1)                                        | Tissue damaging technique, forceful                                |  | Uncoordinated (1)                                | Stiff and uncontrolled movements, overshooting                         |  | Poor (1)                                | No sufficient seam achieved on the rear side          |  | Slow (1)                                | Performance slower than 45                       |  |
|      | Hesitant (2)                                        | Controlled movements but hesitant and inefficient                  |  | Hesitant (2)                                     | Controlled movements, but hesitant and inefficient                     |  | Sufficient (2)                          | Irregular suture, unsafe handling of the approximator |  | Hesitant (3)                            | Performance in under 35 min                      |  |
|      | Safe (4)                                            | Safe and clean dissection technique                                |  | Skilful (4)                                      | Smooth, controlled and meaningful movements                            |  | Good (3)                                | Slightly irregular, sufficient suture                 |  | Swift (4)                               | Performance in under 25 min                      |  |
|      | Versatile (5)                                       | Efficient, economic and safe dissection                            |  | Versatile (6)                                    | Masterful instrument use, effective movements                          |  | Excellent (5)                           | Front like back, sufficient                           |  | Rapid (6)                               | Performance in under 15 min                      |  |
|      | Comments:                                           |                                                                    |  |                                                  |                                                                        |  |                                         |                                                       |  |                                         |                                                  |  |
|      | <b>Tissue preserving technique (Q1.2)</b>           |                                                                    |  | <b>Needle handling (Q2.2)</b>                    |                                                                        |  |                                         |                                                       |  | <b>Perfusion test (Q4.2)</b>            |                                                  |  |
|      | Aggressive (1)                                      | Forceful, damaging tissue handling, unnecessary endothelium damage |  | Uncoordinated (1)                                | Stiff and uncontrolled movements, overshooting, needle damaging        |  |                                         |                                                       |  | Insufficient (1)                        | Severe leakage, total perfusion obstruction      |  |
|      | Inefficient (2)                                     | Hesitant moves, slight tissue damage                               |  | Hesitant (2)                                     | Controlled movements, but hesitant and inefficient                     |  |                                         |                                                       |  | Moderately insufficient (2)             | Moderate leakage, moderate perfusion obstruction |  |
|      | Safe (4)                                            | Safe tissue handling, no essential tissue damage                   |  | Skilful (4)                                      | Smooth, controlled and meaningful movements                            |  |                                         |                                                       |  | Slightly insufficient (3)               | Slight leakage, slight perfusion obstruction     |  |
|      | Efficient (6)                                       | Smooth and efficient tissue handling, perfect tissue preservation  |  | Versatile (5)                                    | Masterful needle use, effective movements                              |  |                                         |                                                       |  | Sufficient (4)                          | No leakage, continuous                           |  |
|      | Comments:                                           |                                                                    |  |                                                  |                                                                        |  |                                         |                                                       |  |                                         |                                                  |  |
|      | <b>Distance of suture to vessel's margin (Q1.3)</b> |                                                                    |  | <b>Thread handling/ knot tying (Q2.3)</b>        |                                                                        |  |                                         |                                                       |  |                                         |                                                  |  |
|      | Inaccurate (1)                                      | Dilettante spacing, inconsistent, randomly                         |  | Hazardous (1)                                    | Insufficient view, uncontrolled movements, thread damaging             |  |                                         |                                                       |  |                                         |                                                  |  |
|      | Irregular (2)                                       | Hesitant and irregular suturing, acceptable spacing                |  | Laborious (2)                                    | Awkward and repeated unnecessary attempts, insufficient knot technique |  |                                         |                                                       |  |                                         |                                                  |  |
|      | Skilful (3)                                         | Right spacing, slightly irregular                                  |  | Efficient (3)                                    | Skilful thread handling, sufficient knot technique                     |  |                                         |                                                       |  |                                         |                                                  |  |
|      | Masterly (5)                                        | Perfect und even suture placing on both margins                    |  | Versatile (4)                                    | Highly efficient and skilful use of thread, safe knotting technique    |  |                                         |                                                       |  |                                         |                                                  |  |
|      | Comments:                                           |                                                                    |  |                                                  |                                                                        |  |                                         |                                                       |  |                                         |                                                  |  |

**To be completed by the assessor:**

| Please <b>mark with an asterisk</b> the point that best represents the level of individual performance.                                                                     |                                                                                                                                                                                                                                                                                                                                                                                                                                                                                                                                                     | Comments |
|-----------------------------------------------------------------------------------------------------------------------------------------------------------------------------|-----------------------------------------------------------------------------------------------------------------------------------------------------------------------------------------------------------------------------------------------------------------------------------------------------------------------------------------------------------------------------------------------------------------------------------------------------------------------------------------------------------------------------------------------------|----------|
| <b>PREPARATION AND TISSUE HANDLING</b><br>exposure of the vascular bundle, adventitia trimming if needed, overall tissue handling and preserving technique<br><b>(Q5.1)</b> | <p><b>Very Poor</b> <span style="margin-left: 150px;"><b>Pass</b></span> <span style="margin-left: 150px;"><b>Excellent</b></span></p> <p>0 10 20 30 40 50 60 70 80 90 100</p> <p>Unable to accomplish goal, marked hesitation, uncontrolled movements, lack of procedure-specific and anatomical knowledge and poor technical skills.</p> <p>Able to accomplish goal without hesitation, excellent progress and flow. Consistent demonstration of procedure-specific and anatomical knowledge. Skills adapted to the context of the procedure.</p> |          |
| <b>INSTRUMENT AND NEEDLE HANDLING</b><br>Safe, decisive and efficient instrument and needle usage<br><b>(Q5.2)</b>                                                          | <p><b>Very Poor</b> <span style="margin-left: 150px;"><b>Pass</b></span> <span style="margin-left: 150px;"><b>Excellent</b></span></p> <p>0 10 20 30 40 50 60 70 80 90 100</p> <p>Unable to accomplish goal, marked hesitation, uncontrolled movements, lack of procedure-specific and anatomical knowledge and poor technical skills.</p> <p>Able to accomplish goal without hesitation, excellent progress and flow. Consistent demonstration of procedure-specific and anatomical knowledge. Skills adapted to the context of the procedure.</p> |          |
| <b>OVERALL EFFICIENCY</b><br>Output per time<br><b>(Q5.3)</b>                                                                                                               | <p><b>Very Poor</b> <span style="margin-left: 150px;"><b>Pass</b></span> <span style="margin-left: 150px;"><b>Excellent</b></span></p> <p>0 10 20 30 40 50 60 70 80 90 100</p> <p>Unable to accomplish goal, marked hesitation, uncontrolled movements, lack of procedure-specific and anatomical knowledge and poor technical skills.</p> <p>Able to accomplish goal without hesitation, excellent progress and flow. Consistent demonstration of procedure-specific and anatomical knowledge. Skills adapted to the context of the procedure.</p> |          |

2. Please **circle** the description that best represents your level of agreement with the statement below:

**This surgeon/trainee has demonstrated the knowledge and skill to undertake a supervised microanastomosis.**

◀-----▶  
 No                      Borderline no                      Undecided                      Borderline yes                      Yes

**To be completed by the trainee on the conventional chicken model:**

Please **mark with an asterisk** the point that best represents the level of individual performance.

|                                                                                                                                                   |                                                                                                                                                                                                                                                                                                        |
|---------------------------------------------------------------------------------------------------------------------------------------------------|--------------------------------------------------------------------------------------------------------------------------------------------------------------------------------------------------------------------------------------------------------------------------------------------------------|
| <p><b>TISSUE RESEMBLANCE</b><br/>How well could the chicken model simulate the tissue properties of human arteries?<br/>(Q6.1)</p>                | <p><b>Very Poor</b> <b>Pass</b> <b>Excellent</b></p> <p>Poor resemblance of tissue properties, crucial differences in consistency and handling</p> <p>Perfect resemblance of tissue properties, crucial differences in consistency and handling</p>                                                    |
| <p><b>REALISTIC SPATIAL-ANATOMICAL CONDITIONS</b><br/>How well could the chicken model simulate the spatial anatomical conditions?<br/>(Q6.2)</p> | <p><b>Very Poor</b> <b>Pass</b> <b>Excellent</b></p> <p>Poor resemblance of spatial anatomical conditions including no presence of undercutting areas and lack of space</p> <p>Perfect resemblance of spatial anatomical conditions including the presence of undercutting areas and lack of space</p> |
| <p><b>OVERALL REALISM</b><br/>General realism of the model<br/>(Q.6.3)</p>                                                                        | <p><b>Very Poor</b> <b>Pass</b> <b>Excellent</b></p> <p>The model fails to simulate anatomical conditions and the surgical procedure of suturing a microanastomosis.</p> <p>The model manages to simulate anatomical conditions and the surgical procedure when suturing a microanastomosis.</p>       |

**To be completed by the trainee on the 3D printed RACE model:**

Please **mark with an asterisk** the point that best represents the level of individual performance.

|                                                                                                                                                                                   |                                                                                                                                                                                                                                                                                                                                                                                                                                                                                     |
|-----------------------------------------------------------------------------------------------------------------------------------------------------------------------------------|-------------------------------------------------------------------------------------------------------------------------------------------------------------------------------------------------------------------------------------------------------------------------------------------------------------------------------------------------------------------------------------------------------------------------------------------------------------------------------------|
| <p><b>TISSUE RESEMBLANCE</b><br/>How well could the RACE model simulate the tissue properties of human arteries compared to the conventional model?<br/>(Q7.1)</p>                | <div> <div>Very Poor</div> <div>Pass</div> <div>Excellent</div> </div> <p>0 10 20 30 40 50 60 70 80 90 100</p> <p>Unable to accomplish goal, marked hesitation, uncontrolled movements, lack of procedure-specific and anatomical knowledge and poor technical skills.</p> <p>Able to accomplish goal without hesitation, excellent progress and flow. Consistent demonstration of procedure-specific and anatomical knowledge. Skills adapted to the context of the procedure.</p> |
| <p><b>REALISTIC SPATIAL ANATOMICAL CONDITIONS</b><br/>How well could the RACE model simulate the spatial anatomical conditions compared to the conventional model?<br/>(Q7.2)</p> | <div> <div>Very Poor</div> <div>Pass</div> <div>Excellent</div> </div> <p>0 10 20 30 40 50 60 70 80 90 100</p> <p>Unable to accomplish goal, marked hesitation, uncontrolled movements, lack of procedure-specific and anatomical knowledge and poor technical skills.</p> <p>Able to accomplish goal without hesitation, excellent progress and flow. Consistent demonstration of procedure-specific and anatomical knowledge. Skills adapted to the context of the procedure.</p> |
| <p><b>OVERALL REALISM</b><br/>How would you rate the RACE model's overall realism compared to the conventional model?<br/>(Q7.3)</p>                                              | <div> <div>Very Poor</div> <div>Pass</div> <div>Excellent</div> </div> <p>0 10 20 30 40 50 60 70 80 90 100</p> <p>Unable to accomplish goal, marked hesitation, uncontrolled movements, lack of procedure-specific and anatomical knowledge and poor technical skills.</p> <p>Able to accomplish goal without hesitation, excellent progress and flow. Consistent demonstration of procedure-specific and anatomical knowledge. Skills adapted to the context of the procedure.</p> |

# **Evaluation of a 3D printed training model with realistic spatial-anatomical conditions for head and neck microsurgery**

## **Clinical Oral Investigations**

Address Correspondence and request for reprints to:

**Manuel Weber MD, DMD**

Department of Oral and Cranio-Maxillofacial Surgery

Friedrich-Alexander University Erlangen-Nürnberg

Glueckstrasse 11, 91054 Erlangen, Germany

Phone: +49-9131-85-43749

Email: [manuel.weber@uk-erlangen.de](mailto:manuel.weber@uk-erlangen.de)
